# Supplementary material for: A serial multiparametric quantitative magnetic resonance imaging study to assess proteoglycan depletion of human articular cartilage and its effects on functionality
Source: PubMed Central journal article supplement (PMC7492285; doi:10.1038/s41598-020-72208-y), 2020-09-15

**Title:** A Serial Multiparametric Quantitative Magnetic Resonance Imaging Study to Assess Proteoglycan Depletion of Human Articular Cartilage and Its Effects on Functionality

**Authors:** Tobias Hafner<sup>1§</sup>, Justus Schock<sup>2,3§</sup>, Manuel Post<sup>1</sup>, Daniel Benjamin Abrar<sup>2</sup>, Philipp Sewerin<sup>4</sup>, Kevin Linka<sup>5</sup>, Matthias Knobe<sup>6</sup>, Christiane Kuhl<sup>1</sup>, Daniel Truhn<sup>1</sup>, Sven Nebelung<sup>2\*</sup>

**Affiliations:** 1 Aachen University Hospital, Department of Diagnostic and Interventional Radiology, Aachen, Germany

2 University Dusseldorf, Medical Faculty, Department of Diagnostic and Interventional Radiology, D-40225 Dusseldorf, Germany

3 Institute of Computer Vision and Imaging, RWTH University Aachen, Aachen, Germany

4 University Dusseldorf, Medical Faculty, Department and Hiller-Research-Unit for Rheumatology, Dusseldorf, Germany

5 Hamburg University of Technology, Department of Continuum and Materials Mechanics, Hamburg, Germany

6 Clinic for Orthopaedic and Trauma Surgery, Cantonal Hospital Luzern, Luzern, Switzerland.

**Journal:** Scientific Reports

Supplementary Table S1 (online only)

|                     | pre exposure    |                         |                         |         | post exposure    |                          |                          |         |
|---------------------|-----------------|-------------------------|-------------------------|---------|------------------|--------------------------|--------------------------|---------|
|                     | $\delta_{0pre}$ | $\delta_{1pre}$         | $\delta_{2pre}$         | p-value | $\delta_{0post}$ | $\delta_{1post}$         | $\delta_{2post}$         | p-value |
| <b>low trypsin</b>  | 2.59 ± 0.32     | 1.72 ± 0.30 (-34 ± 6 %) | 1.50 ± 0.36 (-43 ± 9 %) | < 0.001 | 2.55 ± 0.31 (†)  | 1.78 ± 0.36 (-30 ± 9 %)  | 1.52 ± 0.38 (-41 ± 10 %) | < 0.001 |
| <b>high trypsin</b> | 2.40 ± 0.41     | 1.71 ± 0.30 (-28 ± 8 %) | 1.64 ± 0.22 (-31 ± 9 %) | < 0.001 | 2.43 ± 0.41 (‡)  | 1.71 ± 0.30 (-29 ± 8 %)  | 1.53 ± 0.19 (-36 ± 8 %)  | < 0.001 |
| <b>controls</b>     | 2.77 ± 0.19     | 2.07 ± 0.26 (-26 ± 6 %) | 1.86 ± 0.37 (-34 ± 9 %) | < 0.001 | 2.66 ± 0.22 (§)  | 2.00 ± 0.34 (-25 ± 10 %) | 1.82 ± 0.41 (-32 ± 11 %) | < 0.001 |

Supplementary Table S2 (online only)

|              |           | pre exposure    |                 |                 | post exposure    |                  |                  | p-value |
|--------------|-----------|-----------------|-----------------|-----------------|------------------|------------------|------------------|---------|
|              |           | $\delta_{0pre}$ | $\delta_{1pre}$ | $\delta_{2pre}$ | $\delta_{0post}$ | $\delta_{1post}$ | $\delta_{2post}$ |         |
| low trypsin  | ECS       | 344.4 ± 72.3    | 339.2 ± 70.7    | 307.7 ± 68.3    | 348.3 ± 56.5     | 323.2 ± 67.1     | 303.3 ± 62.4     | < 0.001 |
|              | SPA       | 215.8 ± 47.9    | 208.9 ± 47.4    | 186.0 ± 45.4    | 218.2 ± 39.8     | 200.0 ± 44.4     | 181.4 ± 40.6     | < 0.001 |
|              | SPA upper | 107.6 ± 24.8    | 104.3 ± 25.3    | 93.6 ± 26.5     | 109.5 ± 19.5     | 100.2 ± 22.2     | 90.8 ± 18.1      | < 0.001 |
|              | SPA lower | 108.2 ± 23.5    | 104.6 ± 22.7    | 92.4 ± 20.2     | 108.7 ± 20.7     | 99.8 ± 22.9      | 90.6 ± 23.7      | < 0.001 |
|              | PPA       | 124.7 ± 30.2    | 125.1 ± 29.1    | 118.8 ± 28.1    | 123.0 ± 27.2     | 117.9 ± 31.2     | 118.8 ± 29.9     | 0.088   |
|              | PPA upper | 67.8 ± 16.1     | 66.5 ± 13.4     | 63.5 ± 13.8     | 66.0 ± 14.2      | 63.2 ± 16.3      | 61.1 ± 16.6      | 0.004   |
|              | PPA lower | 56.9 ± 14.2     | 58.6 ± 15.8     | 55.3 ± 14.9     | 57.0 ± 13.3      | 54.7 ± 15.1      | 57.7 ± 14.0      | 0.392   |
| high trypsin | ECS       | 281.3 ± 67.5    | 263.5 ± 51.5    | 253.0 ± 62.2    | 289.4 ± 68.9     | 258.5 ± 60.9     | 235.8 ± 61.9     | < 0.001 |
|              | SPA       | 185.6 ± 44.7    | 173.1 ± 34.5    | 164.1 ± 39.9    | 193.7 ± 41.9     | 170.2 ± 39.2     | 148.8 ± 38.5     | < 0.001 |
|              | SPA upper | 94.5 ± 22.0     | 89.2 ± 17.2     | 82.6 ± 19.3     | 97.1 ± 21.0      | 82.7 ± 21.2      | 75.2 ± 20.0      | < 0.001 |
|              | SPA lower | 91.1 ± 23.2     | 83.9 ± 18.3     | 81.5 ± 22.6     | 96.6 ± 21.3      | 87.5 ± 18.3      | 73.6 ± 20.9      | < 0.001 |
|              | PPA       | 92.6 ± 28.5     | 89.9 ± 25.6     | 85.3 ± 25.8     | 93.8 ± 34.8      | 85.2 ± 26.1      | 84.6 ± 28.4      | 0.017   |
|              | PPA upper | 49.7 ± 15.2     | 48.8 ± 13.3     | 45.6 ± 14.3     | 51.7 ± 19.9      | 46.3 ± 14.8      | 44.5 ± 14.6      | 0.009   |
|              | PPA lower | 42.9 ± 13.7     | 41.1 ± 12.9     | 39.7 ± 11.8     | 42.1 ± 15.3      | 38.9 ± 11.5      | 40.1 ± 14.0      | 0.151   |
| controls     | ECS       | 307.3 ± 52.3    | 293.5 ± 50.6    | 273.7 ± 45.5    | 306.0 ± 51.3     | 298.9 ± 46.3     | 273.8 ± 50.5     | < 0.001 |
|              | SPA       | 216.1 ± 32.0    | 202.7 ± 27.6    | 188.6 ± 25.8    | 216.0 ± 31.1     | 206.3 ± 27.4     | 189.1 ± 35.1     | < 0.001 |
|              | SPA upper | 106.3 ± 17.5    | 103.6 ± 14.5    | 96.4 ± 12.1     | 107.5 ± 14.4     | 104.0 ± 15.4     | 93.3 ± 17.0      | < 0.001 |
|              | SPA lower | 109.8 ± 15.0    | 99.1 ± 14.8     | 92.2 ± 14.7     | 108.5 ± 17.0     | 102.3 ± 15.6     | 95.8 ± 18.5      | < 0.001 |
|              | PPA       | 88.8 ± 28.9     | 88.4 ± 32.2     | 83.2 ± 27.5     | 89.6 ± 29.2      | 91.5 ± 25.9      | 84.3 ± 23.9      | 0.043   |
|              | PPA upper | 49.7 ± 15.2     | 48.8 ± 13.3     | 45.6 ± 14.3     | 51.7 ± 19.9      | 46.3 ± 14.8      | 44.5 ± 14.6      | 0.019   |
|              | PPA lower | 41.0 ± 15.2     | 40.8 ± 15.6     | 41.1 ± 15.9     | 42.4 ± 15.6      | 43.7 ± 15.0      | 40.9 ± 13.6      | 0.218   |

Supplementary Table S3 (online only)

|     |              |           | pre exposure        |                         |                            |         | post exposure       |                         |                            |         |
|-----|--------------|-----------|---------------------|-------------------------|----------------------------|---------|---------------------|-------------------------|----------------------------|---------|
|     |              |           | $\delta_{0pre}$     | $\delta_{1pre}$         | $\delta_{2pre}$            | p-value | $\delta_{0post}$    | $\delta_{1post}$        | $\delta_{2post}$           | p-value |
| T1  | low trypsin  | entire    | 658.0 (646.0-692.7) | 640.3 (632.5-654.2)     | <b>618.8 (604.6-628.5)</b> | <0.001  | 672.9 (663.4-686.2) | 651.0 (635.9-666.3)     | <b>628.6 (601.2-650.8)</b> | <0.001  |
|     |              | SPA       | 658.0 (647.8-691.7) | 624.3 (613.4-644.8)     | <b>598.5 (585.6-613.7)</b> | <0.001  | 664.6 (657.5-685.6) | 634.6 (621.7-656.0)     | <b>603.6 (579.8-613.2)</b> | <0.001  |
|     |              | SPA upper | 739.1 (724.9-774.6) | 682.1 (659.5-704.3)     | <b>643.5 (589.6-652.0)</b> | <0.001  | 751.3 (733.0-781.0) | 691.0 (679.9-698.6)     | <b>631.5 (609.1-652.0)</b> | <0.001  |
|     |              | SPA lower | 582.4 (572.0-624.8) | 572.6 (553.7-603.0)     | 574.1 (569.2-582.2)        | 0.046   | 585.1 (574.8-606.2) | 582.4 (563.2-599.2)     | 575.4 (567.7-578.0)        | 0.066   |
|     |              | PPA       | 660.2 (649.9-692.4) | 665.6 (649.2-673.6)     | <b>647.3 (641.7-653.6)</b> | 0.006   | 681.2 (671.7-689.7) | 681.0 (655.3-687.4)     | 662.5 (635.6-684.2)        | 0.135   |
|     |              | PPA upper | 727.4 (713.1-758.2) | 734.2 (705.9-747.4)     | <b>711.3 (679.8-724.9)</b> | <0.001  | 749.7 (737.2-773.7) | 749.0 (731.7-757.6)     | 726.9 (681.0-752.2)        | 0.026   |
|     |              | PPA lower | 583.4 (569.4-635.5) | 593.1 (587.1-601.5)     | 578.5 (575.2-595.7)        | 0.066   | 600.0 (584.5-626.3) | 599.6 (583.6-614.3)     | 592.2 (570.5-620.3)        | 0.601   |
|     | high trypsin | entire    | 649.6 (627.5-731.9) | 627.9 (612.1-691.9)     | <b>599.2 (584.0-643.6)</b> | <0.001  | 662.4 (650.0-746.9) | 627.4 (619.4-695.6)     | <b>600.0 (581.5-651.6)</b> | <0.001  |
|     |              | SPA       | 651.1 (626.5-729.6) | 624.9 (599.8-678.9)     | <b>587.0 (571.1-618.0)</b> | <0.001  | 658.1 (649.0-746.9) | 616.3 (584.9-670.2)     | <b>583.8 (552.8-616.0)</b> | <0.001  |
|     |              | SPA upper | 724.0 (706.9-819.2) | 688.0 (661.9-730.9)     | <b>631.1 (617.9-649.2)</b> | <0.001  | 783.7 (717.0-848.4) | 676.2 (649.1-707.4)     | <b>608.2 (599.6-633.7)</b> | <0.001  |
|     |              | SPA lower | 586.9 (554.7-639.2) | 564.4 (531.3-627.8)     | <b>542.3 (517.1-586.9)</b> | 0.003   | 589.1 (537.9-645.3) | 587.8 (545.0-626.1)     | <b>565.3 (516.3-596.6)</b> | 0.006   |
|     |              | PPA       | 651.9 (635.5-750.5) | 648.0 (629.3-715.2)     | <b>630.9 (608.7-677.7)</b> | <0.001  | 676.6 (649.6-754.7) | 674.5 (645.2-733.4)     | <b>634.2 (626.3-698.4)</b> | <0.001  |
|     |              | PPA upper | 743.1 (714.3-811.9) | 744.4 (690.4-775.6)     | <b>714.8 (669.4-729.0)</b> | <0.001  | 794.1 (733.2-845.9) | 765.4 (735.3-793.5)     | <b>736.4 (700.4-756.4)</b> | <0.001  |
|     |              | PPA lower | 577.9 (543.8-641.0) | 569.3 (551.8-619.6)     | <b>562.3 (539.9-602.5)</b> | <0.001  | 559.2 (536.0-632.5) | 597.7 (532.8-639.2)     | 572.0 (531.2-634.0)        | 0.135   |
|     | controls     | entire    | 679.3 (621.5-687.4) | 653.5 (592.1-664.3)     | <b>617.3 (567.1-632.0)</b> | <0.001  | 672.5 (629.5-677.3) | 634.3 (595.7-647.7)     | <b>596.5 (572.2-619.9)</b> | <0.001  |
|     |              | SPA       | 670.4 (614.0-682.4) | 645.7 (583.0-655.4)     | <b>612.1 (548.6-624.8)</b> | <0.001  | 665.4 (630.4-668.4) | 615.6 (577.7-636.7)     | <b>588.8 (552.8-605.7)</b> | <0.001  |
|     |              | SPA upper | 735.9 (702.5-769.5) | 679.7 (660.0-717.7)     | <b>626.5 (616.9-667.8)</b> | <0.001  | 724.0 (706.5-747.6) | 650.7 (624.8-695.9)     | <b>618.0 (598.3-638.7)</b> | <0.001  |
|     |              | SPA lower | 573.6 (549.1-609.9) | 569.9 (551.5-609.4)     | 552.0 (523.0-600.0)        | 0.057   | 575.9 (549.5-594.0) | 552.2 (533.9-586.3)     | 550.2 (508.4-586.2)        | 0.107   |
|     |              | PPA       | 680.6 (642.6-695.5) | 666.1 (617.8-671.2)     | <b>628.3 (596.3-651.6)</b> | 0.019   | 666.1 (631.1-694.5) | 643.4 (627.2-686.1)     | <b>618.3 (603.3-638.1)</b> | 0.003   |
|     |              | PPA upper | 748.7 (710.7-749.6) | 705.6 (691.3-744.7)     | <b>675.7 (650.6-706.2)</b> | 0.006   | 726.9 (714.9-765.7) | 709.3 (674.2-743.1)     | <b>662.3 (645.2-691.7)</b> | <0.001  |
|     |              | PPA lower | 581.0 (564.1-605.2) | 576.3 (560.7-622.7)     | 572.7 (543.4-593.4)        | 0.814   | 587.0 (565.1-590.5) | 572.0 (549.7-605.2)     | 567.6 (536.6-597.0)        | 0.685   |
| T1p | low trypsin  | entire    | 62.7 (58.4-66.2)    | <b>72.0 (66.6-73.2)</b> | <b>72.2 (67.9-75.2)</b>    | <0.001  | 60.7 (57.7-69.0)    | <b>68.4 (65.5-76.6)</b> | <b>70.4 (66.5-73.6)</b>    | <0.001  |
|     |              | SPA       | 65.2 (60.1-69.4)    | <b>76.3 (70.1-77.8)</b> | <b>74.4 (72.6-78.4)</b>    | <0.001  | 63.9 (60.5-70.0)    | <b>72.7 (67.8-79.6)</b> | <b>74.3 (69.7-76.7)</b>    | <0.001  |
|     |              | SPA upper | 68.7 (64.8-72.9)    | <b>83.7 (77.8-88.6)</b> | <b>80.8 (78.1-87.8)</b>    | <0.001  | 70.9 (61.9-73.1)    | <b>83.6 (74.6-88.1)</b> | <b>82.4 (75.3-84.4)</b>    | <0.001  |
|     |              | SPA lower | 59.1 (54.7-65.4)    | 65.8 (61.2-69.6)        | <b>68.2 (64.0-69.6)</b>    | 0.002   | 59.5 (55.9-64.7)    | 64.1 (60.0-71.1)        | 64.6 (62.5-69.6)           | 0.222   |
|     |              | PPA       | 59.2 (54.3-62.5)    | 63.3 (62.4-67.4)        | <b>65.2 (62.4-68.7)</b>    | <0.001  | 57.1 (50.7-67.5)    | <b>60.5 (59.7-70.4)</b> | <b>61.9 (61.0-68.3)</b>    | <0.001  |
|     |              | PPA upper | 60.0 (57.3-65.1)    | <b>70.1 (66.2-71.3)</b> | <b>70.5 (67.5-74.0)</b>    | <0.001  | 60.6 (51.8-68.0)    | 68.2 (62.7-76.6)        | 68.2 (64.8-73.7)           | 0.007   |
|     |              | PPA lower | 54.5 (50.7-60.5)    | 58.3 (55.3-62.2)        | <b>58.9 (56.8-64.4)</b>    | 0.003   | 55.0 (48.0-62.4)    | 56.0 (51.8-62.8)        | 57.1 (55.0-60.8)           | 0.046   |
|     | high trypsin | entire    | 62.7 (55.2-64.9)    | <b>68.4 (64.9-71.3)</b> | <b>69.2 (65.8-72.3)</b>    | <0.001  | 62.3 (56.7-70.2)    | <b>67.0 (64.0-74.5)</b> | 69.2 (64.3-76.0)           | 0.006   |
|     |              | SPA       | 64.4 (55.5-66.3)    | <b>71.4 (68.0-73.0)</b> | <b>70.6 (68.6-75.0)</b>    | <0.001  | 64.6 (60.7-70.4)    | <b>70.5 (67.5-76.5)</b> | 71.1 (68.5-76.8)           | 0.003   |
|     |              | SPA upper | 69.0 (59.5-74.3)    | <b>79.9 (70.2-83.1)</b> | 78.6 (72.3-83.8)           | <0.001  | 71.7 (64.4-81.5)    | <b>78.5 (70.1-83.8)</b> | 77.2 (73.0-84.9)           | 0.003   |
|     |              | SPA lower | 58.0 (53.2-58.2)    | 64.2 (60.7-67.2)        | <b>68.1 (61.5-69.0)</b>    | <0.001  | 57.5 (54.5-59.6)    | 66.3 (61.3-68.1)        | 67.4 (63.6-68.4)           | 0.007   |
|     |              | PPA       | 57.4 (53.7-64.0)    | 61.4 (59.0-66.8)        | 63.0 (59.3-69.8)           | 0.030   | 56.6 (49.8-70.2)    | 62.0 (56.3-71.3)        | 62.8 (58.8-70.1)           | 0.135   |
|     |              | PPA upper | 65.3 (56.3-67.5)    | 67.0 (60.8-74.1)        | <b>68.8 (63.4-73.7)</b>    | 0.012   | 65.3 (52.3-72.9)    | 65.9 (59.4-78.9)        | 66.7 (60.8-75.1)           | 0.078   |
|     |              | PPA lower | 53.9 (48.7-57.7)    | 56.5 (54.9-61.5)        | 60.8 (55.3-63.1)           | 0.222   | 52.0 (44.4-60.3)    | 56.4 (52.7-63.4)        | <b>58.2 (54.8-66.5)</b>    | 0.003   |
|     | controls     | entire    | 65.1 (61.3-72.6)    | 71.5 (69.9-79.1)        | 71.1 (70.3-78.4)           | 0.016   | 59.8 (52.5-66.8)    | 67.1 (63.2-71.1)        | <b>68.6 (66.0-71.5)</b>    | <0.001  |
|     |              | SPA       | 68.2 (62.7-73.2)    | <b>74.9 (71.8-81.8)</b> | <b>74.8 (72.7-80.4)</b>    | <0.001  | 59.9 (53.2-66.5)    | 70.1 (64.3-72.8)        | <b>71.2 (67.6-73.5)</b>    | <0.001  |
|     |              | SPA upper | 72.2 (66.2-79.2)    | <b>82.2 (79.2-90.7)</b> | <b>86.3 (77.1-88.6)</b>    | <0.001  | 64.8 (57.0-71.1)    | <b>77.5 (70.3-82.5)</b> | <b>76.7 (74.1-82.0)</b>    | <0.001  |
|     |              | SPA lower | 64.4 (57.7-70.2)    | 66.9 (64.4-70.4)        | <b>67.8 (64.8-72.9)</b>    | 0.006   | 55.1 (49.5-59.0)    | 60.5 (56.0-63.5)        | <b>62.1 (60.4-65.7)</b>    | 0.019   |
|     |              | PPA       | 62.3 (57.9-70.6)    | 65.0 (62.7-73.3)        | 65.0 (63.5-72.3)           | 0.031   | 59.0 (49.5-63.0)    | 61.9 (54.9-66.5)        | <b>60.9 (60.1-65.7)</b>    | 0.010   |
|     |              | PPA upper | 66.9 (61.6-73.7)    | 69.7 (66.1-79.8)        | 69.4 (65.7-77.8)           | 0.107   | 64.0 (50.2-67.4)    | <b>69.4 (60.3-69.7)</b> | <b>66.0 (61.3-71.2)</b>    | <0.001  |

|     |              |           |                  |                         |                         |                  |                  |                         |                         |                  |
|-----|--------------|-----------|------------------|-------------------------|-------------------------|------------------|------------------|-------------------------|-------------------------|------------------|
|     |              | PPA lower | 58.2 (57.5-65.8) | 62.5 (58.7-64.5)        | 62.5 (61.3-64.4)        | 0.278            | 54.1 (46.3-58.4) | 55.4 (51.2-58.8)        | <b>58.4 (53.8-59.3)</b> | <b>0.006</b>     |
| T2  | low trypsin  | entire    | 37.6 (35.3-42.3) | 40.6 (38.4-44.7)        | 41.1 (38.8-42.8)        | 0.018            | 40.0 (37.9-45.3) | 41.0 (37.6-46.2)        | 41.7 (38.0-44.4)        | 0.135            |
|     |              | SPA       | 36.8 (34.5-43.4) | 40.0 (37.0-45.4)        | 39.8 (38.4-42.4)        | 0.030            | 40.9 (36.5-43.6) | 41.1 (36.0-44.9)        | 41.9 (36.4-43.1)        | 0.135            |
|     |              | SPA upper | 44.3 (43.1-49.1) | 48.1 (46.4-51.9)        | 46.6 (44.4-50.3)        | 0.066            | 50.4 (43.1-53.8) | 50.0 (41.8-54.6)        | 46.7 (42.3-50.2)        | 0.092            |
|     |              | SPA lower | 30.5 (25.8-39.1) | 31.1 (28.1-41.6)        | 31.6 (30.8-37.2)        | 0.316            | 32.6 (28.9-36.6) | 33.5 (28.2-40.1)        | 34.9 (29.7-40.5)        | 0.316            |
|     |              | PPA       | 38.7 (36.5-41.9) | <b>41.7 (39.4-43.1)</b> | <b>42.8 (38.8-43.7)</b> | <b>0.001</b>     | 40.9 (36.2-47.6) | 41.5 (38.4-49.0)        | 43.0 (40.4-47.4)        | 0.187            |
|     |              | PPA upper | 42.6 (41.1-49.6) | <b>46.2 (45.1-53.4)</b> | 47.1 (44.0-53.6)        | <b>&lt;0.001</b> | 46.9 (39.0-52.9) | 47.8 (42.9-57.2)        | 48.1 (44.2-55.6)        | 0.078            |
|     |              | PPA lower | 33.3 (30.0-40.4) | 35.6 (31.1-39.0)        | <b>36.9 (31.5-40.0)</b> | <b>0.002</b>     | 36.3 (29.4-41.1) | 35.8 (31.1-44.6)        | 36.9 (32.1-44.1)        | 0.316            |
|     | high trypsin | entire    | 37.2 (34.4-40.6) | 36.9 (35.9-42.3)        | 36.2 (34.6-40.8)        | 0.316            | 40.4 (35.6-45.7) | 39.2 (35.3-45.4)        | <b>37.3 (34.4-42.5)</b> | <b>&lt;0.001</b> |
|     |              | SPA       | 37.0 (33.6-40.2) | 36.5 (35.2-41.6)        | 35.9 (33.3-38.5)        | 0.078            | 40.9 (35.4-45.5) | 38.6 (34.6-44.1)        | <b>35.7 (33.7-39.9)</b> | <b>&lt;0.001</b> |
|     |              | SPA upper | 44.6 (39.4-49.1) | 45.5 (39.2-51.9)        | 42.5 (39.6-45.3)        | 0.066            | 47.4 (44.6-56.1) | 46.2 (42.6-51.4)        | <b>42.6 (39.9-44.7)</b> | <b>&lt;0.001</b> |
|     |              | SPA lower | 30.8 (25.8-33.9) | 31.3 (25.9-35.5)        | 31.8 (27.7-35.6)        | 0.078            | 32.9 (26.0-39.7) | 34.6 (26.3-40.3)        | 34.6 (27.0-36.9)        | 0.710            |
|     |              | PPA       | 37.4 (35.6-41.5) | 38.3 (36.9-44.1)        | 38.0 (36.6-45.3)        | 0.187            | 39.3 (36.5-48.7) | 39.8 (38.2-49.3)        | 40.4 (38.1-49.2)        | 1.000            |
|     |              | PPA upper | 44.1 (40.6-48.5) | 46.9 (40.1-52.5)        | 46.9 (41.5-52.5)        | 0.316            | 46.5 (42.1-56.5) | 47.2 (43.5-58.1)        | 47.3 (42.4-58.0)        | 0.710            |
|     |              | PPA lower | 35.2 (26.6-36.8) | 35.5 (26.2-37.9)        | 36.9 (28.1-38.7)        | 0.316            | 35.0 (27.3-41.3) | 38.5 (27.3-40.9)        | 39.0 (29.1-41.6)        | 0.436            |
|     | controls     | entire    | 44.3 (38.0-46.4) | 44.0 (40.1-46.5)        | 42.1 (38.3-46.3)        | 0.107            | 35.6 (34.6-41.0) | 35.9 (34.8-39.0)        | 34.8 (34.0-37.6)        | 0.328            |
|     |              | SPA       | 43.8 (36.9-45.3) | 42.5 (38.9-46.7)        | 40.8 (36.8-46.2)        | 0.057            | 35.0 (34.2-40.0) | 35.1 (34.5-37.7)        | 33.9 (33.3-35.8)        | 0.107            |
|     |              | SPA upper | 47.8 (46.6-52.8) | 48.3 (45.7-54.9)        | <b>45.6 (42.1-51.7)</b> | <b>&lt;0.001</b> | 45.1 (38.8-46.1) | 40.7 (39.6-46.6)        | 39.4 (37.7-44.0)        | 0.016            |
|     |              | SPA lower | 37.5 (35.8-42.8) | 38.9 (33.0-39.3)        | 39.5 (34.6-40.0)        | 1.000            | 29.5 (26.7-36.8) | 30.4 (26.2-34.7)        | 28.5 (25.9-33.9)        | 0.814            |
|     |              | PPA       | 45.2 (42.6-49.7) | 45.5 (44.8-48.7)        | 44.8 (43.7-46.4)        | 0.328            | 38.8 (35.1-43.1) | 40.1 (37.3-41.7)        | 38.1 (35.2-41.3)        | 0.814            |
|     |              | PPA upper | 50.9 (44.0-52.5) | 49.9 (49.1-54.4)        | 48.3 (46.4-51.1)        | <b>0.010</b>     | 45.4 (39.7-45.5) | 45.9 (41.8-48.6)        | 44.1 (41.8-47.6)        | 0.569            |
|     |              | PPA lower | 40.6 (39.1-45.9) | 43.1 (39.3-45.3)        | 41.5 (39.0-44.1)        | 0.569            | 35.5 (26.3-38.0) | 32.4 (29.5-38.1)        | 33.2 (29.1-38.9)        | 0.971            |
| T2* | low trypsin  | entire    | 32.0 (29.6-36.5) | <b>35.0 (32.4-39.8)</b> | 35.2 (33.5-37.6)        | <b>0.003</b>     | 35.0 (32.7-38.6) | 36.4 (32.5-40.4)        | 35.9 (32.8-38.9)        | 0.018            |
|     |              | SPA       | 31.2 (28.5-37.0) | 34.7 (31.5-40.1)        | 34.7 (32.7-37.1)        | 0.046            | 35.3 (31.1-38.0) | 36.5 (32.0-39.2)        | 35.6 (31.4-38.1)        | 0.046            |
|     |              | SPA upper | 39.4 (35.6-44.7) | 42.3 (39.8-44.3)        | 41.0 (38.7-43.2)        | 0.222            | 44.3 (35.3-47.1) | 44.4 (37.2-46.5)        | 43.2 (37.4-44.9)        | 0.187            |
|     |              | SPA lower | 23.2 (21.5-30.0) | <b>26.3 (24.4-35.8)</b> | 26.7 (25.7-31.3)        | 0.012            | 27.2 (23.1-31.1) | <b>29.0 (24.9-34.7)</b> | 28.3 (25.0-33.6)        | <b>&lt;0.001</b> |
|     |              | PPA       | 33.3 (30.7-37.1) | <b>36.6 (33.0-38.5)</b> | <b>37.1 (33.2-38.5)</b> | <b>&lt;0.001</b> | 35.8 (31.2-40.4) | <b>36.6 (33.7-42.7)</b> | 37.0 (34.9-41.0)        | <b>0.006</b>     |
|     |              | PPA upper | 38.9 (34.5-42.8) | <b>41.6 (38.2-43.6)</b> | <b>41.8 (38.5-44.9)</b> | <b>0.001</b>     | 42.0 (35.0-47.2) | 41.5 (37.7-48.7)        | 42.5 (38.8-47.3)        | 0.368            |
|     |              | PPA lower | 26.9 (23.6-33.1) | <b>30.0 (26.4-34.2)</b> | <b>30.9 (25.7-35.4)</b> | <b>&lt;0.001</b> | 29.8 (24.7-33.2) | 30.8 (26.8-36.6)        | <b>32.0 (26.4-36.6)</b> | <b>0.006</b>     |
|     | high trypsin | entire    | 31.6 (29.7-34.0) | 32.0 (30.9-36.9)        | 31.3 (30.1-35.0)        | 0.018            | 32.7 (30.6-39.8) | 33.0 (30.6-40.2)        | 31.0 (29.9-36.7)        | 0.018            |
|     |              | SPA       | 31.8 (27.8-34.1) | 31.5 (30.3-36.6)        | 30.7 (28.0-33.6)        | 0.135            | 33.5 (29.6-40.0) | 33.2 (30.1-39.7)        | 30.5 (28.9-34.8)        | 0.026            |
|     |              | SPA upper | 38.3 (33.0-44.0) | 39.1 (33.6-45.0)        | 37.0 (33.5-39.8)        | 0.026            | 41.0 (36.3-50.9) | 39.7 (36.3-46.9)        | <b>37.5 (33.2-40.8)</b> | <b>0.006</b>     |
|     |              | SPA lower | 23.4 (21.2-27.2) | 26.2 (21.9-29.7)        | 25.3 (23.5-29.6)        | 0.046            | 26.3 (21.7-29.9) | 29.9 (22.3-34.4)        | 25.9 (22.4-29.9)        | 0.135            |
|     |              | PPA       | 31.9 (29.6-34.8) | <b>33.1 (31.7-38.2)</b> | 33.0 (31.7-38.3)        | <b>0.006</b>     | 31.1 (29.4-41.9) | 34.5 (31.8-42.1)        | 33.1 (29.8-41.3)        | 0.066            |
|     |              | PPA upper | 38.1 (35.6-41.9) | 41.3 (36.0-45.5)        | 40.7 (37.7-46.8)        | 0.066            | 38.5 (35.5-50.3) | 40.6 (36.8-48.6)        | 39.1 (36.6-49.9)        | 0.601            |
|     |              | PPA lower | 26.0 (21.1-30.1) | <b>31.0 (21.7-31.8)</b> | 30.4 (22.0-33.4)        | <b>0.006</b>     | 27.9 (20.3-32.3) | 33.1 (21.5-36.4)        | 27.1 (21.2-34.2)        | 0.046            |
|     | controls     | entire    | 35.1 (30.5-37.9) | 35.5 (31.2-40.2)        | 34.2 (30.0-39.8)        | 0.069            | 30.6 (29.1-34.2) | 30.7 (29.8-32.9)        | 29.6 (28.8-31.2)        | 0.154            |
|     |              | SPA       | 36.1 (30.9-37.2) | 34.1 (31.4-39.5)        | 33.8 (30.3-39.3)        | 0.107            | 30.2 (29.5-33.6) | 30.6 (29.8-32.0)        | 29.4 (28.8-29.9)        | 0.048            |
|     |              | SPA upper | 39.8 (36.5-45.6) | 41.0 (36.9-47.5)        | 38.5 (35.4-46.4)        | 0.031            | 38.4 (34.0-39.7) | 34.5 (32.3-40.6)        | <b>35.7 (30.4-38.0)</b> | <b>0.010</b>     |

|  |                  |                  |                  |                  |       |                  |                  |                  |       |
|--|------------------|------------------|------------------|------------------|-------|------------------|------------------|------------------|-------|
|  | <b>SPA lower</b> | 30.2 (22.6-32.5) | 32.3 (21.9-33.1) | 31.8 (21.3-33.0) | 0.569 | 23.9 (21.8-30.4) | 25.5 (21.7-30.6) | 24.4 (21.0-29.0) | 0.971 |
|  | <b>PPA</b>       | 34.9 (30.7-40.6) | 39.1 (31.6-40.2) | 36.4 (30.4-38.2) | 0.107 | 33.3 (28.5-35.2) | 34.5 (30.2-34.6) | 32.0 (30.1-33.7) | 0.685 |
|  | <b>PPA upper</b> | 37.9 (35.9-44.4) | 42.3 (40.9-45.9) | 39.9 (37.5-43.4) | 0.278 | 37.8 (34.1-39.5) | 38.8 (36.1-42.7) | 36.4 (34.0-40.1) | 0.398 |
|  | PPA lower        | 31.2 (22.7-31.9) | 35.2 (26.7-36.1) | 32.9 (24.6-34.5) | 0.685 | 25.8 (21.3-30.4) | 26.2 (24.5-30.9) | 26.1 (23.9-31.4) | 0.685 |

Supplementary Figure S1 (online only)

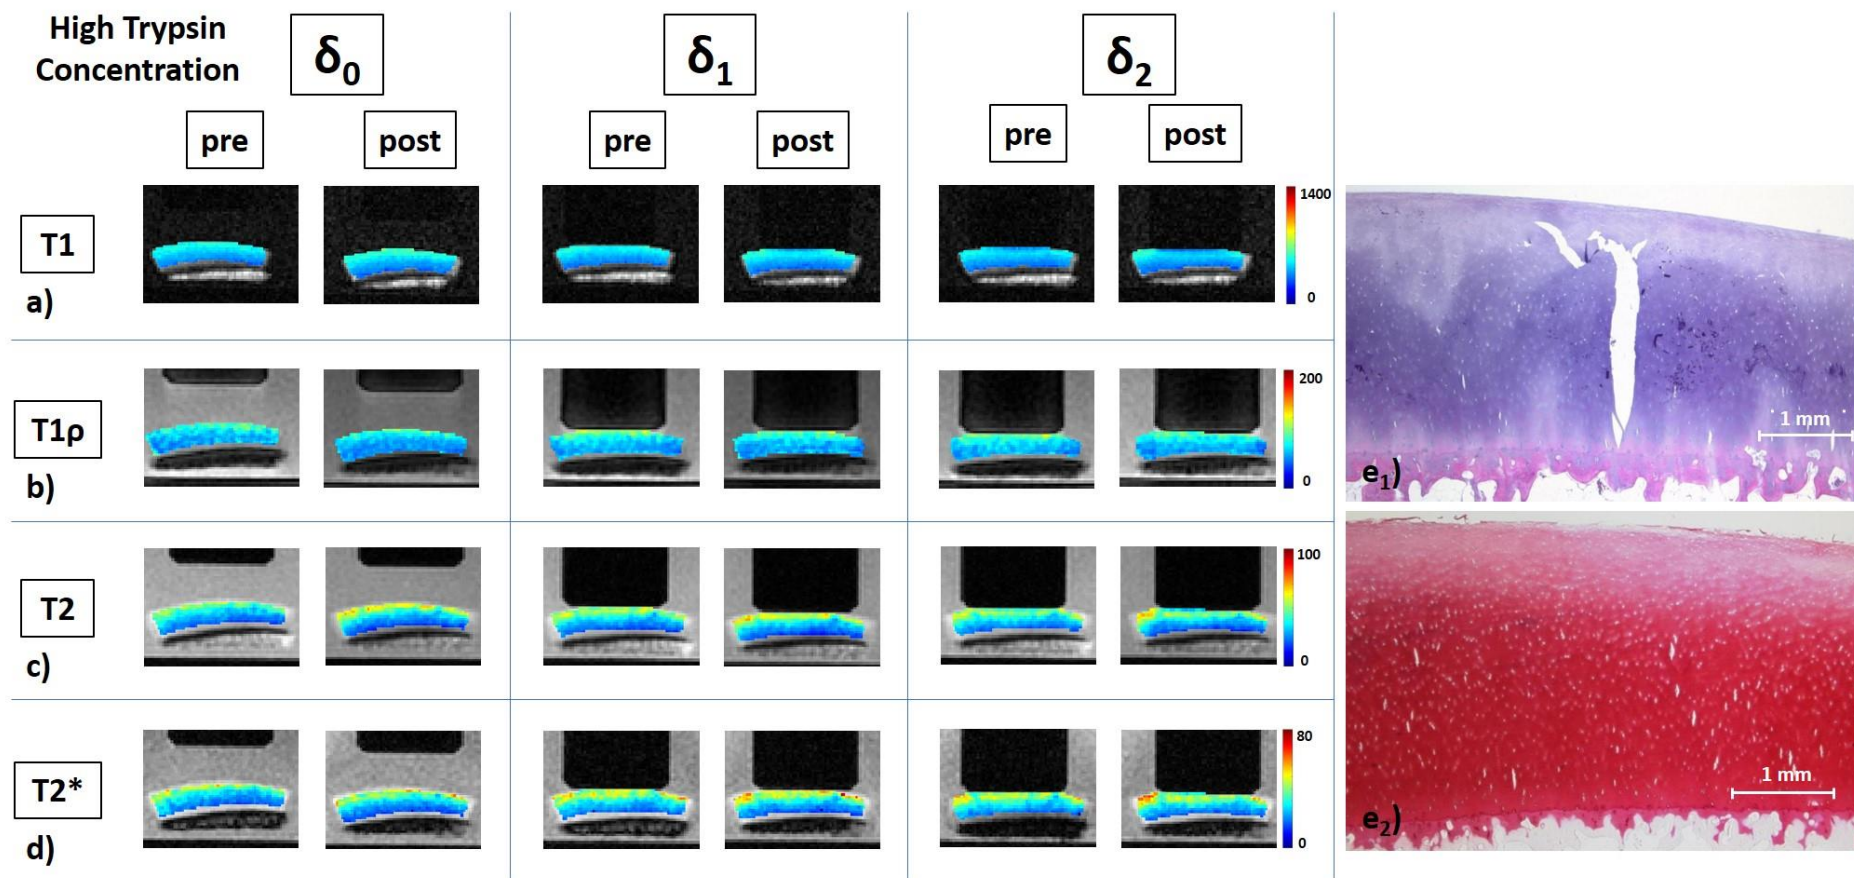

Supplementary Figure S2 (online only)

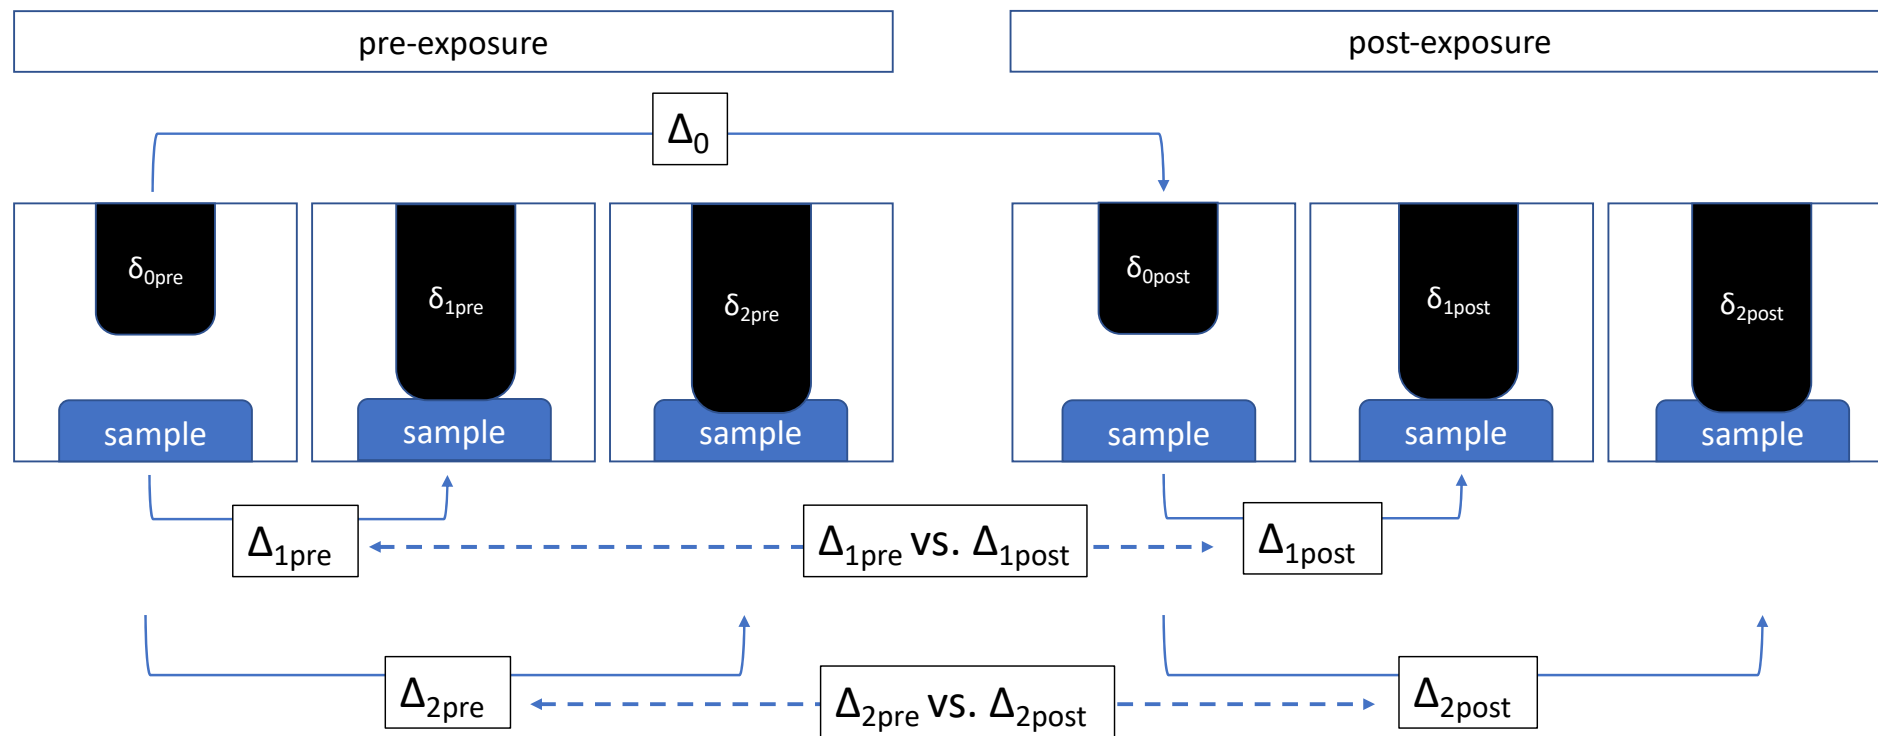

Supplement: 41598_2020_72208_MOESM1_ESM.pdf [file 41598_2020_72208_MOESM1_ESM.pdf]
